# Supplementary material for: Effects of pacing strategy on metabolic responses to 2-min intense exercise in Thoroughbred horses
Source: PubMed Central journal article supplement (PMC11306589; doi:10.1038/s41598-024-69339-x), 2024-08-07
Supplement: 41598_2024_69339_MOESM1_ESM.pdf [file 41598_2024_69339_MOESM1_ESM.pdf]

● Positive (1-min)    ● Negative (1-min)  
● Positive (2-min)    ● Negative (2-min)

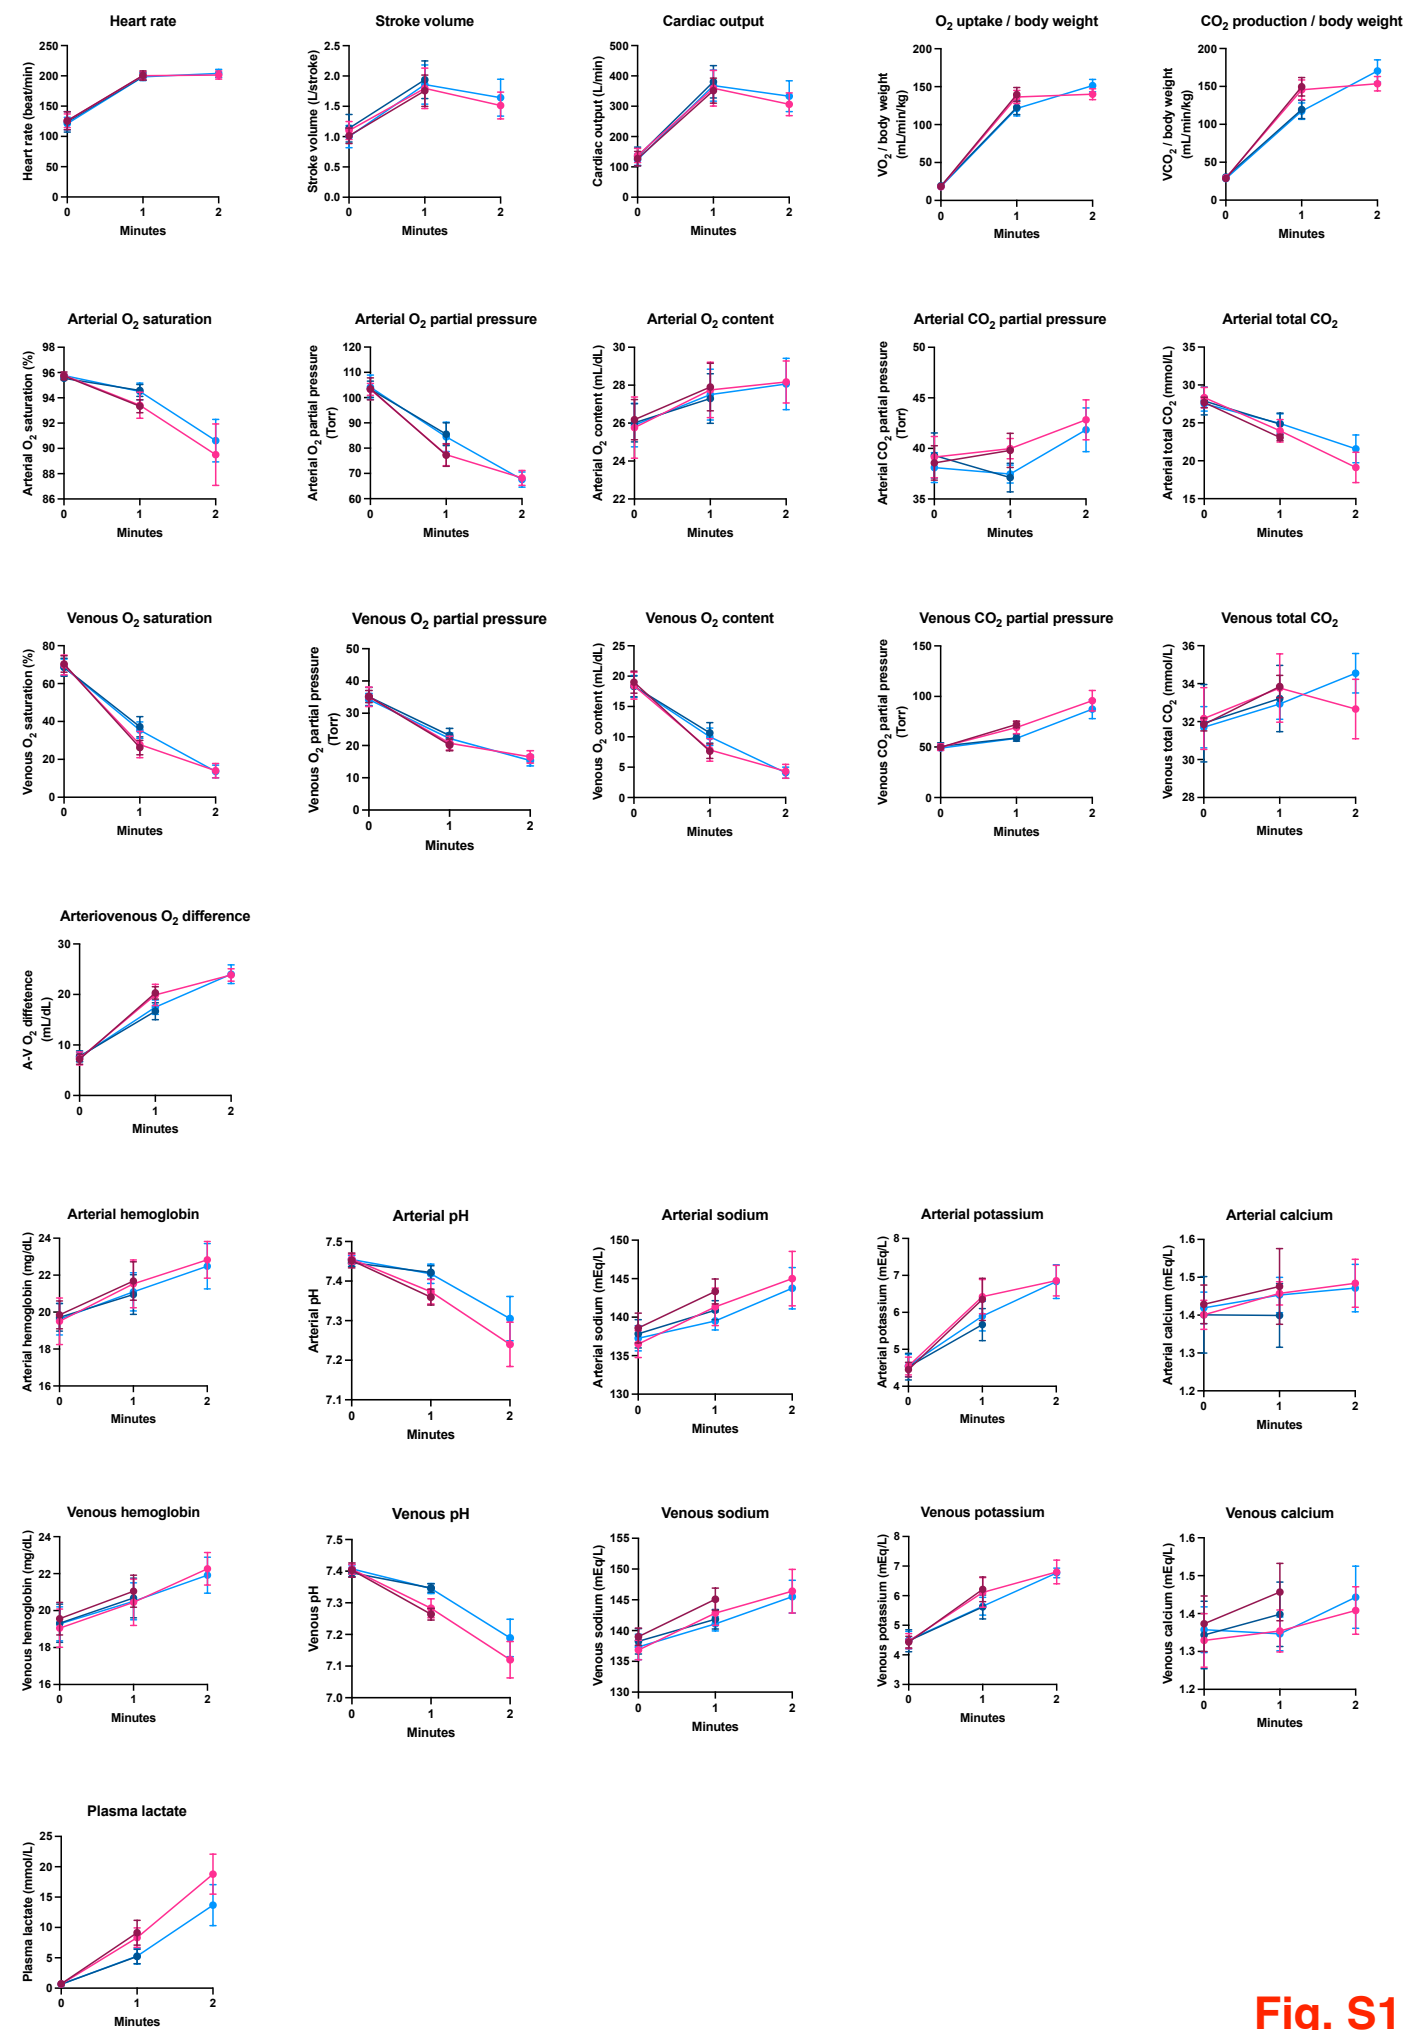

**Fig. S1**
