# Supplementary material for: Effects of pacing strategy on metabolic responses to 2-min intense exercise in Thoroughbred horses
Source: PubMed Central journal article supplement (PMC11306589; doi:10.1038/s41598-024-69339-x), 2024-08-07
Supplement: 41598_2024_69339_MOESM2_ESM.pdf [file 41598_2024_69339_MOESM2_ESM.pdf]

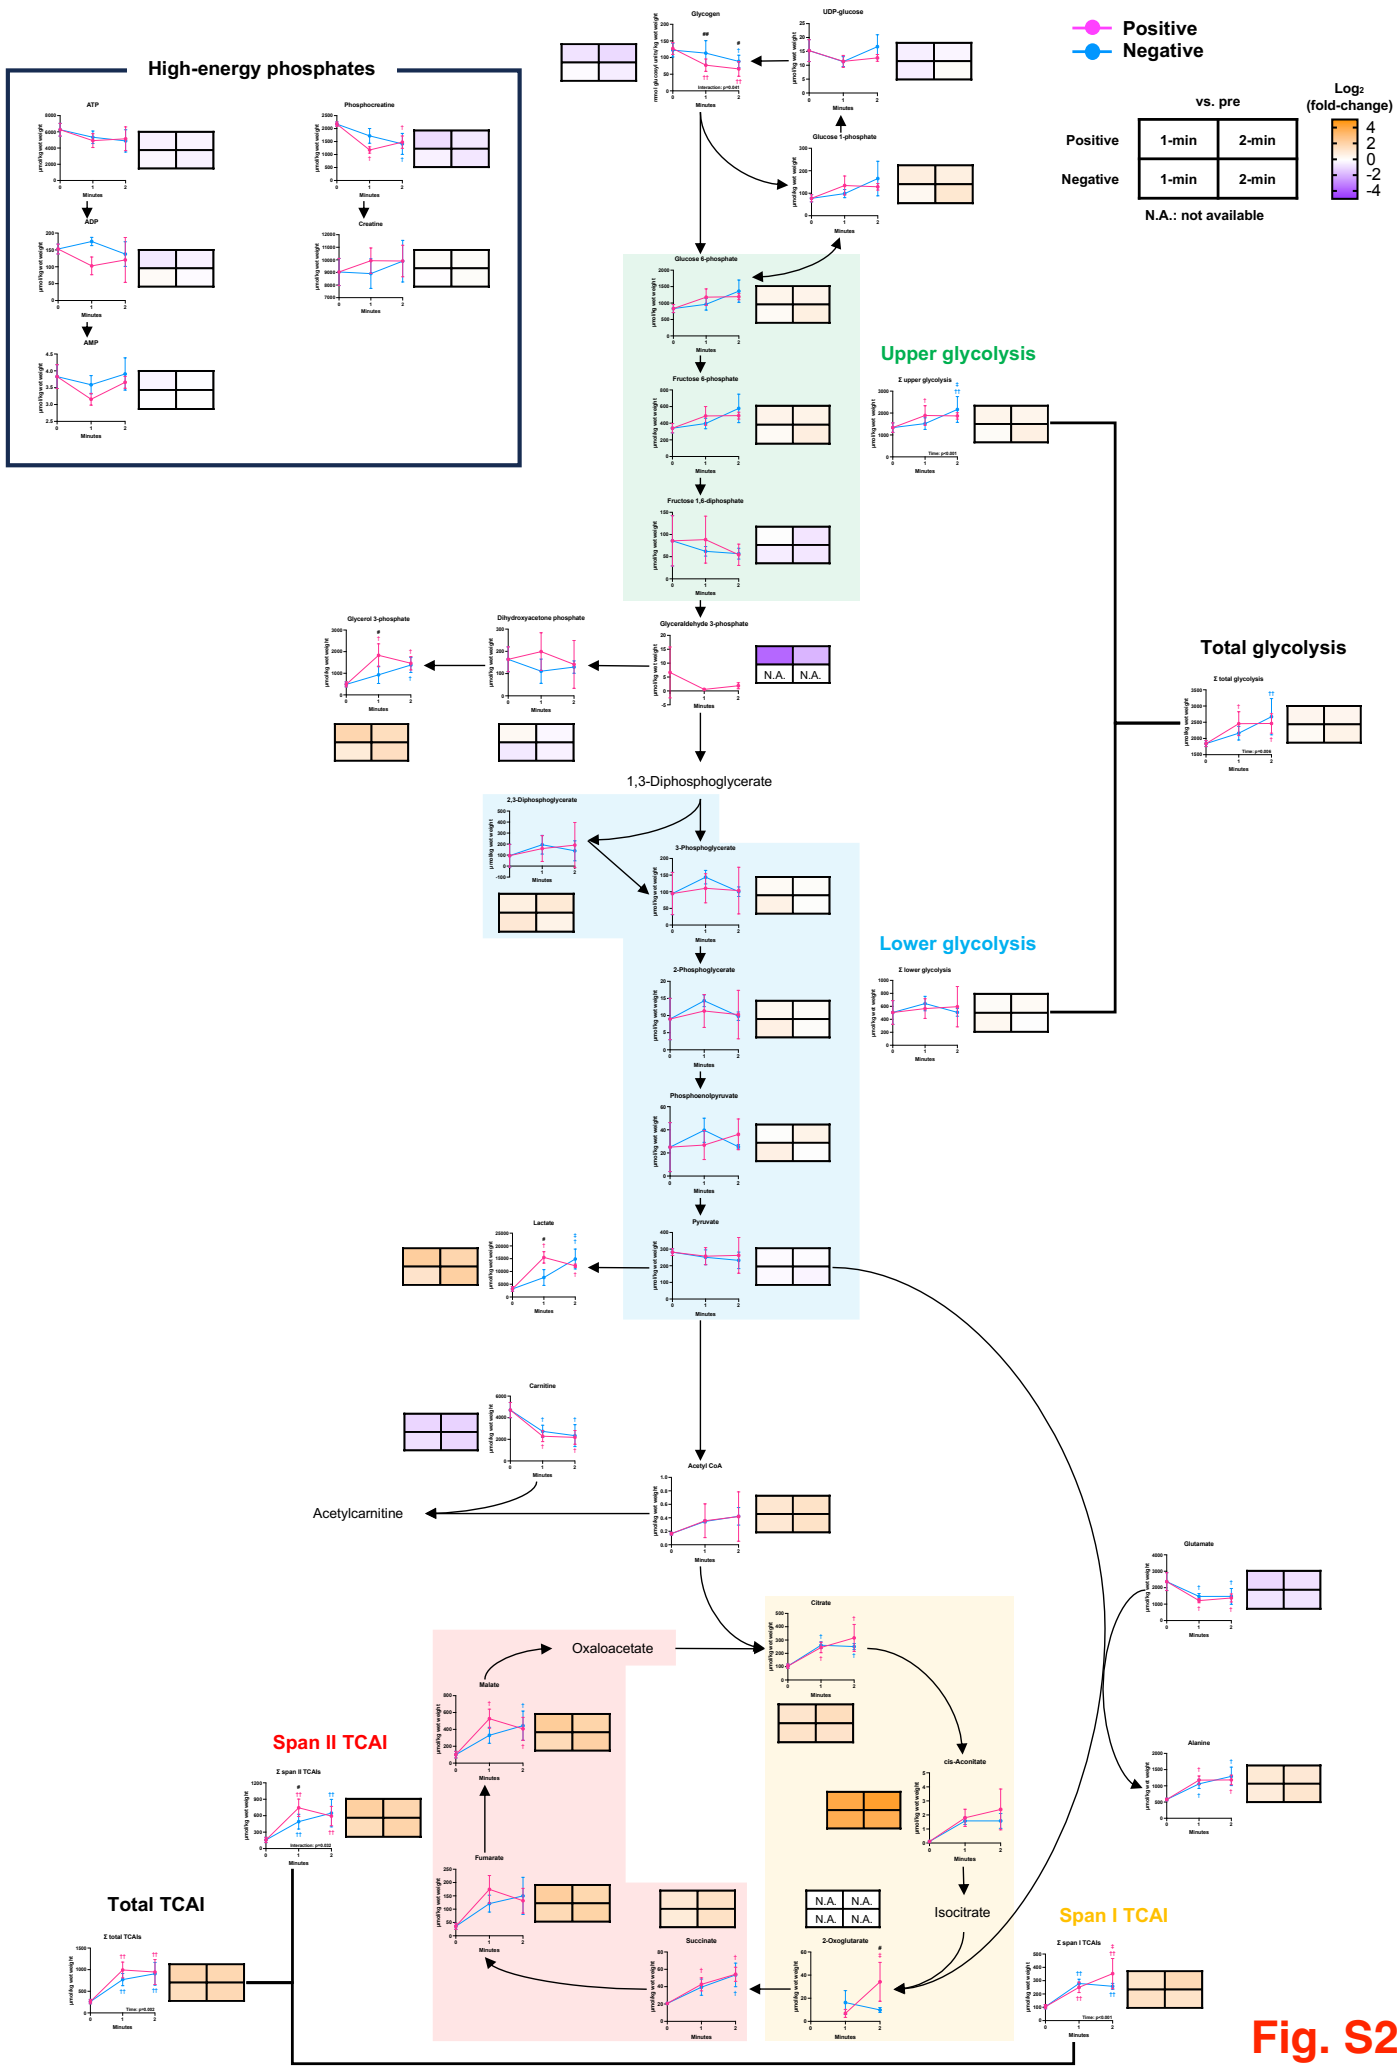

**Fig. S2**
